# Supplementary material
Source: PubMed Central journal article supplement (PMC4965288)
Supplement: NIHMS790112-supplement-2.pdf [file NIHMS790112-supplement-2.pdf]

| <b>Supplemental Table 1.</b> List of reagents and suppliers |                                                                                                                                                                                      |                              |              |
|-------------------------------------------------------------|--------------------------------------------------------------------------------------------------------------------------------------------------------------------------------------|------------------------------|--------------|
| Chemical Supplies                                           | Chemical Name                                                                                                                                                                        | Supplier                     | Part Number  |
| ExM Gel or Preparation                                      | Sodium Acrylate (purity note:*)                                                                                                                                                      | Sigma                        | 408220       |
|                                                             | Acrylamide                                                                                                                                                                           | Sigma                        | A9099        |
|                                                             | N,N'-Methylenebisacrylamide                                                                                                                                                          | Sigma                        | M7279        |
|                                                             | Ammonium Persulfate                                                                                                                                                                  | Sigma                        | A3678        |
|                                                             | N,N,N',N'-Tetramethylethylenediamine                                                                                                                                                 | Sigma                        | T7024        |
|                                                             | VA-044                                                                                                                                                                               | Wako                         | 27776-21-2   |
|                                                             | 4-Hydroxy-TEMPO                                                                                                                                                                      | Sigma                        | 176141       |
| Hybridization Buffer                                        | Dextran Sulfate                                                                                                                                                                      | Sigma                        | D8906-50g    |
|                                                             | SSC                                                                                                                                                                                  | Thermo Fisher                | AM9765       |
|                                                             | Formamide                                                                                                                                                                            | Thermo Fisher                | AM9342       |
| Fixation and Permeabilization                               | Paraformaldehyde                                                                                                                                                                     | Electron Microscopy Sciences | 15710        |
|                                                             | Tissue-prep Buffered 10% Formalin                                                                                                                                                    | Electron Microscopy Sciences | 15742-10     |
|                                                             | Triton X-100                                                                                                                                                                         | Sigma                        | 93426        |
|                                                             | Ethyl Alcohol                                                                                                                                                                        | Sigma                        | E7023        |
|                                                             | Glycine                                                                                                                                                                              | Sigma                        | 50046        |
|                                                             | 10x PBS                                                                                                                                                                              | Thermo Fisher                | AM9624       |
| Protein Digestion                                           | Proteinase K                                                                                                                                                                         | New England Biolabs          | P8107S       |
|                                                             | Ethylenediaminetetraacetic acid                                                                                                                                                      | Sigma                        | EDS          |
|                                                             | Sodium Chloride                                                                                                                                                                      | Sigma                        | S9888        |
|                                                             | Tris-HCl                                                                                                                                                                             | Life Technologies            | AM9855       |
| HCR Amplification                                           | Amplification Buffer                                                                                                                                                                 | Molecular Instruments        | N/A          |
|                                                             | Tween 20                                                                                                                                                                             | Sigma                        | P1379        |
| LabelX Preparation                                          | Label-IT ® Amine                                                                                                                                                                     | Mirus Bio                    | MIR 3900     |
|                                                             | Acryloyl-X, SE                                                                                                                                                                       | Thermo Fisher                | A20770       |
| LabelX Treatment                                            | MOPS                                                                                                                                                                                 | Sigma                        | M9381-25G    |
| Reembedded Gels Staining                                    | DNase I                                                                                                                                                                              | Sigma                        | 4716728001   |
| Bind-silane Treatment                                       | Bind-Silane                                                                                                                                                                          | Sigma                        | GE17-1330-01 |
|                                                             | * check for yellow color upon resuspension: that indicates poor quality; solution should be clear (see <a href="http://expansionmicroscopy.org">http://expansionmicroscopy.org</a> ) |                              |              |

| Decades<br>(Transcript<br>Abundance) | Mean (Ratio of #<br>spots detected in<br>individual cells<br>after ExM, to #<br>spots detected<br>before ExM) | Standard<br>Deviation | Sample size ( <i>n</i> ) | <i>p</i> -Value       |
|--------------------------------------|---------------------------------------------------------------------------------------------------------------|-----------------------|--------------------------|-----------------------|
| 10s                                  | 1.082                                                                                                         | 0.177                 | 14                       | 0.107                 |
| 100s                                 | 1.105                                                                                                         | 0.138                 | 29                       | 3.24×10 <sup>-4</sup> |
| 1000s                                | 1.596                                                                                                         | 0.562                 | 16                       | 7.09×10 <sup>-4</sup> |

**Supplementary Table 2.** Statistical Analysis of RNA FISH spots detected in individual cells before and after ExFISH. For RNA molecules detected before vs after expansion, spots were counted by an automated algorithm. The ratio of the number of spots after ExM to spots counted before ExM was determined for each cell. Spot counts were grouped into decades based on the pre-expansion spot count. The table shows the results of a one-sample T-test performed on the ratio of spots counts for each decade to determine significant deviation from the expected mean ratio value of one.

| Target               | Total Spot Count<br>(Averaged Across<br>Both Red and Blue<br>Channels) | Co-localized Spots | Co-localization % | Hybridization<br>Efficiency | Volume analyzed<br>( $\mu\text{m}^3$ in unexpanded<br>coordinates) | Density (Co-<br>localized Puncta per<br>$\mu\text{m}^3$ ) |
|----------------------|------------------------------------------------------------------------|--------------------|-------------------|-----------------------------|--------------------------------------------------------------------|-----------------------------------------------------------|
| <i>ActB</i>          | 27504                                                                  | 15866              | 0.577             | 0.76                        | 236749                                                             | 0.067                                                     |
| <i>Dlg4</i>          | 9795                                                                   | 5174               | 0.528             | 0.727                       | 236749                                                             | 0.022                                                     |
| <i>Camk2a</i>        | 14440                                                                  | 8799               | 0.609             | 0.781                       | 147968                                                             | 0.059                                                     |
| <i>Dlg4</i> Missense | 1540                                                                   | 4                  | 0.003             | 0.051                       | 147968                                                             | 0                                                         |
| mCherry              | 1209                                                                   | 0                  | 0                 | 0                           | 147968                                                             | 0                                                         |

**Supplementary Table 3.** Analysis of two-color colocalization of FISH probes with HCR amplification in expanded slices.

**Supplementary Video 1.** Volume rendering of Thy1-YFP (green) brain tissue acquired by lightsheet microscopy with HCR-ExFISH targeting *YFP* (red) and *Gad1* (blue) mRNA. Movie of volume in **Supp. Fig. 9**.
