# Supplementary material
Source: PubMed Central journal article supplement (PMC4965288)
Supplement: NIHMS790112-supplement-3.pdf [file NIHMS790112-supplement-3.pdf]

## Accession

## Accession

## Probe Sequence

## Initiator Type

|           |                                                            |    |
|-----------|------------------------------------------------------------|----|
| YFP B1 1  | gAggAgggCagCAAAcgggAAgAgTCTTCCTTTACgTAATctcgccttgctcacat   | B1 |
| YFP B1 2  | gAggAgggCagCAAAcgggAAgAgTCTTCCTTTACgTAATcaccacccggtgaacag  | B1 |
| YFP B1 3  | gAggAgggCagCAAAcgggAAgAgTCTTCCTTTACgTAATtccagctcgaccagatg  | B1 |
| YFP B1 4  | gAggAgggCagCAAAcgggAAgAgTCTTCCTTTACgTAATgtggccgtttacgtcg   | B1 |
| YFP B1 5  | gAggAgggCagCAAAcgggAAgAgTCTTCCTTTACgTAATctcgcggacacgctgaa  | B1 |
| YFP B1 6  | gAggAgggCagCAAAcgggAAgAgTCTTCCTTTACgTAATtagtggtcgccttcg    | B1 |
| YFP B1 7  | gAggAgggCagCAAAcgggAAgAgTCTTCCTTTACgTAATtactcagggtcagcttc  | B1 |
| YFP B1 8  | gAggAgggCagCAAAcgggAAgAgTCTTCCTTTACgTAATcttccgggtggtcagat  | B1 |
| YFP B1 9  | gAggAgggCagCAAAcgggAAgAgTCTTCCTTTACgTAATgtggccagggcacgggc  | B1 |
| YFP B1 10 | gAggAgggCagCAAAcgggAAgAgTCTTCCTTTACgTAATagccgaaggtggtcacga | B1 |
| YFP B1 11 | gAggAgggCagCAAAcgggAAgAgTCTTCCTTTACgTAATggcgaagcactgcaggcc | B1 |
| YFP B1 12 | gAggAgggCagCAAAcgggAAgAgTCTTCCTTTACgTAATtcatgtgtcgggtgag   | B1 |
| YFP B1 13 | gAggAgggCagCAAAcgggAAgAgTCTTCCTTTACgTAATtactgaagaagtctgtct | B1 |
| YFP B1 14 | gAggAgggCagCAAAcgggAAgAgTCTTCCTTTACgTAATgtagccttcgggcatggc | B1 |
| YFP B1 15 | gAggAgggCagCAAAcgggAAgAgTCTTCCTTTACgTAATaagatggtgcctcctgg  | B1 |
| YFP B1 16 | gAggAgggCagCAAAcgggAAgAgTCTTCCTTTACgTAATagtgtccgtcgtccttga | B1 |
| YFP B1 17 | gAggAgggCagCAAAcgggAAgAgTCTTCCTTTACgTAATcacctcggcgggtctt   | B1 |
| YFP B1 18 | gAggAgggCagCAAAcgggAAgAgTCTTCCTTTACgTAATagggtgtcgcctcgaac  | B1 |
| YFP B1 19 | gAggAgggCagCAAAcgggAAgAgTCTTCCTTTACgTAATtcagctcgtcgttca    | B1 |
| YFP B1 20 | gAggAgggCagCAAAcgggAAgAgTCTTCCTTTACgTAATctcctgaagtctgatcc  | B1 |
| YFP B1 21 | gAggAgggCagCAAAcgggAAgAgTCTTCCTTTACgTAATgtccccaggatgttccg  | B1 |
| YFP B1 22 | gAggAgggCagCAAAcgggAAgAgTCTTCCTTTACgTAATgtagtgtactccagct   | B1 |
| YFP B1 23 | gAggAgggCagCAAAcgggAAgAgTCTTCCTTTACgTAATgatataagcgttgtggct | B1 |
| YFP B1 24 | gAggAgggCagCAAAcgggAAgAgTCTTCCTTTACgTAATttctctgttctcggcc   | B1 |
| YFP B1 25 | gAggAgggCagCAAAcgggAAgAgTCTTCCTTTACgTAATtgaagttcaccttgatgc | B1 |
| YFP B1 26 | gAggAgggCagCAAAcgggAAgAgTCTTCCTTTACgTAATctcgatgttgtggcggat | B1 |
| YFP B1 27 | gAggAgggCagCAAAcgggAAgAgTCTTCCTTTACgTAATcggagctgcacgtcggc  | B1 |
| YFP B1 28 | gAggAgggCagCAAAcgggAAgAgTCTTCCTTTACgTAATgttctgctgtgtggt    | B1 |
| YFP B1 29 | gAggAgggCagCAAAcgggAAgAgTCTTCCTTTACgTAATggggccgtcggatggg   | B1 |
| YFP B1 30 | gAggAgggCagCAAAcgggAAgAgTCTTCCTTTACgTAATgtgttgcgggcagcagc  | B1 |
| YFP B1 31 | gAggAgggCagCAAAcgggAAgAgTCTTCCTTTACgTAATcggactgtagctcaggt  | B1 |
| YFP B1 32 | gAggAgggCagCAAAcgggAAgAgTCTTCCTTTACgTAATgttgggtctttgctcag  | B1 |
| YFP B1 33 | gAggAgggCagCAAAcgggAAgAgTCTTCCTTTACgTAATaccatgtatcgccttc   | B1 |
| YFP B1 34 | gAggAgggCagCAAAcgggAAgAgTCTTCCTTTACgTAATcggtcacgaactccagca | B1 |
| YFP B1 35 | gAggAgggCagCAAAcgggAAgAgTCTTCCTTTACgTAATgccgagatgatcccggc  | B1 |
| YFP B1 36 | gAggAgggCagCAAAcgggAAgAgTCTTCCTTTACgTAATtacttgtacagctcgtcc | B1 |

|         | Probe Sequence                                                | Initiator |
|---------|---------------------------------------------------------------|-----------|
| Gad1 1  | GGCGAAGGAGTGGAAAGATGCCAAAAGCTCAGTCCATCCTCgTAAATCCTCATCAATCATC | B2        |
| Gad1 2  | GGATCCGCTCCCGCTTCGAGGAAgCATTCTTTCTTgAggAgggCagCAAACgggAAgAg   | B1        |
| Gad1 3  | GTAGGGCGCAGGTTGGTAGTATAAAgCTCAGTCCATCCTCgTAAATCCTCATCAATCATC  | B2        |
| Gad1 4  | TGGGCTACGCCACACCAAGTATAAagCATTCTTTCTTgAggAgggCagCAAACgggAAgAg | B1        |
| Gad1 5  | AGGCCAGTTTTCTGGTGCATCAAAGCTCAGTCCATCCTCgTAAATCCTCATCAATCATC   | B2        |
| Gad1 6  | TTGGTCTTTGTAAGAAGCCACAAGCATTCTTTCTTgAggAgggCagCAAACgggAAgAg   | B1        |
| Gad1 7  | AGACGACTTCTCTCCAGGCAAAGCTCAGTCCATCCTCgTAAATCCTCATCAATCATC     | B2        |
| Gad1 8  | GAGGACTGCCTCTCCCTGAAGGAAgCATTCTTTCTTgAggAgggCagCAAACgggAAgAg  | B1        |
| Gad1 9  | TTTTACAGGAAAGCAGGTTCTAAAgCTCAGTCCATCCTCgTAAATCCTCATCAATCATC   | B2        |
| Gad1 10 | GTGCGCCGGAAGCGGCACCCTAAgCATTCTTTCTTgAggAgggCagCAAACgggAAgAg   | B1        |
| Gad1 11 | AACAGGTTGGAGAAGTCGGTCTAAAgCTCAGTCCATCCTCgTAAATCCTCATCAATCATC  | B2        |
| Gad1 12 | CCGTTCTTAGCTGGAAGCAGATAAgCATTCTTTCTTgAggAgggCagCAAACgggAAgAg  | B1        |
| Gad1 13 | AAGAAGTGCAGTTTCTCCTAAAgCTCAGTCCATCCTCgTAAATCCTCATCAATCATC     | B2        |
| Gad1 14 | TAGTTGAGGAGTATGTCTACCAAAGCATTCTTTCTTgAggAgggCagCAAACgggAAgAg  | B1        |
| Gad1 15 | GAGCGATCAAATGTCTTTCGGA AAAgCTCAGTCCATCCTCgTAAATCCTCATCAATCATC | B2        |
| Gad1 16 | TGTGGGTGTTGGAATCCAGAAAAGCATTCTTTCTTgAggAgggCagCAAACgggAAgAg   | B1        |
| Gad1 17 | CCTTCCATGCCTTCCAGCAACTAAAgCTCAGTCCATCCTCgTAAATCCTCATCAATCATC  | B2        |
| Gad1 18 | TCGGGGTGGTCCAGACAGTCCAAAAGCATTCTTTCTTgAggAgggCagCAAACgggAAgAg | B1        |
| Gad1 19 | TCAACCAGGATCTGCTCCAGAGAAAAGCTCAGTCCATCCTCgTAAATCCTCATCAATCATC | B2        |
| Gad1 20 | CGAACCCGTA CTTCAGGGTGTAAGCATTCTTTCTTgAggAgggCagCAAACgggAAgAg  | B1        |
| Gad1 21 | TTGAAAAATCGAGGGTGACCTGAAAAGCTCAGTCCATCCTCgTAAATCCTCATCAATCATC | B2        |
| Gad1 22 | CCAATGATATCCAAACCAGTAGAAgCATTCTTTCTTgAggAgggCagCAAACgggAAgAg  | B1        |
| Gad1 23 | GATGTCAGCCATTCACCAGCTAAAAGCTCAGTCCATCCTCgTAAATCCTCATCAATCATC  | B2        |
| Gad1 24 | TCATATGTGAACATATTGGTATAAAGCATTCTTTCTTgAggAgggCagCAAACgggAAgAg | B1        |
| Gad1 25 | ATGAGAACAAAACCGGGTGCAAAAAGCTCAGTCCATCCTCgTAAATCCTCATCAATCATC  | B2        |
| Gad1 26 | TCTCTCATCTTTAAGAGTAAAAGCATTCTTTCTTgAggAgggCagCAAACgggAAgAg    | B1        |
| Gad1 27 | TCTTTATTGACCATCCAACGAAAAGCTCAGTCCATCCTCgTAAATCCTCATCAATCATC   | B2        |
| Gad1 28 | GCTCCCCAGGAGAAAATATCCAAGCATTCTTTCTTgAggAgggCagCAAACgggAAgAg   | B1        |
| Gad1 29 | ATGATGTGTACATATTGGATAAAAAGCTCAGTCCATCCTCgTAAATCCTCATCAATCATC  | B2        |
| Gad1 30 | ACTTCTGGGAAGTACTTGTAAACAAGCATTCTTTCTTgAggAgggCagCAAACgggAAgAg | B1        |
| Gad1 31 | ACAGCCGCATGCCTTTTGTCTAAAAGCTCAGTCCATCCTCgTAAATCCTCATCAATCATC  | B2        |
| Gad1 32 | TGTTCTGAGGTGAAGAGGACAAAAGCATTCTTTCTTgAggAgggCagCAAACgggAAgAg  | B1        |
| Gad1 33 | GCTTTCTTTATGGAATAGTGACAAAAGCTCAGTCCATCCTCgTAAATCCTCATCAATCATC | B2        |
| Gad1 34 | TTGTCGGTCCAAAAGCCAAGCGAAgCATTCTTTCTTgAggAgggCagCAAACgggAAgAg  | B1        |
| Gad1 35 | TCATTGCACTTTATCAAATCAAAGCTCAGTCCATCCTCgTAAATCCTCATCAATCATC    | B2        |
| Gad1 36 | TCTAAATCAGCCGGAATTATCTAAgCATTCTTTCTTgAggAgggCagCAAACgggAAgAg  | B1        |
| Gad1 37 | TGTTTGGCATCAAGAATTTTTGAAAAGCTCAGTCCATCCTCgTAAATCCTCATCAATCATC | B2        |
| Gad1 38 | GCATTGACATAAAGGGGAACATAAAGCATTCTTTCTTgAggAgggCagCAAACgggAAgAg | B1        |
| Gad1 39 | CCGTAAACAGTCGTGCCTGCGGAAAGCTCAGTCCATCCTCgTAAATCCTCATCAATCATC  | B2        |
| Gad1 40 | TCCGCAATTTCTGGATTGGATAAAGCATTCTTTCTTgAggAgggCagCAAACgggAAgAg  | B1        |
| Gad1 41 | CAAAGGTTGTATTTCTCACATAAAAAGCTCAGTCCATCCTCgTAAATCCTCATCAATCATC | B2        |
| Gad1 42 | CCACCACCCAGGCAGCATCCAAAAGCATTCTTTCTTgAggAgggCagCAAACgggAAgAg  | B1        |
| Gad1 43 | CGGTGCTCCGGGACATGAGCAAAAAGCTCAGTCCATCCTCgTAAATCCTCATCAATCATC  | B2        |
| Gad1 44 | TTGGCCCTTTCTATGCCGCTGAAAAGCATTCTTTCTTgAggAgggCagCAAACgggAAgAg | B1        |
| Gad1 45 | TTGTGAGGGTCCAGGTGACTGAAAAGCTCAGTCCATCCTCgTAAATCCTCATCAATCATC  | B2        |
| Gad1 46 | GCAGAGCACTGGAGCAGCACGCAAGCATTCTTTCTTgAggAgggCagCAAACgggAAgAg  | B1        |
| Gad1 47 | ATACCCTTTCTTGACCAGAAAAAGCTCAGTCCATCCTCgTAAATCCTCATCAATCATC    | B2        |
| Gad1 48 | CCTGCACACATCTGGTTGCATCAAGCATTCTTTCTTgAggAgggCagCAAACgggAAgAg  | B1        |

|                  | Probe Sequence                                                 | Initiator |
|------------------|----------------------------------------------------------------|-----------|
| ActB B2 2        | CCTCgTAAATCCTCATCAATCATCCAgTAAACCgCCAAggaatacagcccggggagcatc   | B2        |
| ActB B2 4        | CCTCgTAAATCCTCATCAATCATCCAgTAAACCgCCAAcaccacataggagtccttctg    | B2        |
| ActB B2 6        | CCTCgTAAATCCTCATCAATCATCCAgTAAACCgCCAAcaatggggacttcagggtcag    | B2        |
| ActB B2 8        | CCTCgTAAATCCTCATCAATCATCCAgTAAACCgCCAAggtgccagatcttctccatgtc   | B2        |
| ActB B2 10       | CCTCgTAAATCCTCATCAATCATCCAgTAAACCgCCAAatcatctttcacggttggcctt   | B2        |
| ActB B2 12       | CCTCgTAAATCCTCATCAATCATCCAgTAAACCgCCAAatggctacgtacatggctggggt  | B2        |
| ActB B2 14       | CCTCgTAAATCCTCATCAATCATCCAgTAAACCgCCAAcaatgctgtgtgacgaccaga    | B2        |
| ActB B2 16       | CCTCgTAAATCCTCATCAATCATCCAgTAAACCgCCAAcctctagatgggcacagtgtg    | B2        |
| ActB B2 18       | CCTCgTAAATCCTCATCAATCATCCAgTAAACCgCCAAatctcatgaggtagtctgtca    | B2        |
| ActB B2 20       | CCTCgTAAATCCTCATCAATCATCCAgTAAACCgCCAAatttcctctcagctgtgtgtg    | B2        |
| ActB B2 22       | CCTCgTAAATCCTCATCAATCATCCAgTAAACCgCCAAatcgaagtctagacacatagc    | B2        |
| ActB B2 24       | CCTCgTAAATCCTCATCAATCATCCAgTAAACCgCCAAatagctcttctccaggagggaag  | B2        |
| ActB B2 26       | CCTCgTAAATCCTCATCAATCATCCAgTAAACCgCCAAcggaaaccgctcgttgccaatag  | B2        |
| ActB B2 28       | CCTCgTAAATCCTCATCAATCATCCAgTAAACCgCCAAcaggattccataccaagaagg    | B2        |
| ActB B2 30       | CCTCgTAAATCCTCATCAATCATCCAgTAAACCgCCAAatcaacgtcacacttcatgatgg  | B2        |
| ActB B2 32       | CCTCgTAAATCCTCATCAATCATCCAgTAAACCgCCAAgtggtaccaccagacagcactg   | B2        |
| ActB B2 34       | CCTCgTAAATCCTCATCAATCATCCAgTAAACCgCCAAagagcagtaatctccttctgca   | B2        |
| ActB B2 36       | CCTCgTAAATCCTCATCAATCATCCAgTAAACCgCCAAatgctcagggaggacatga      | B2        |
| ActB B2 38       | CCTCgTAAATCCTCATCAATCATCCAgTAAACCgCCAAaaggtggacagtggccaggga    | B2        |
| ActB B2 40       | CCTCgTAAATCCTCATCAATCATCCAgTAAACCgCCAAgagggggccggaactcatcgtact | B2        |
| Act Short HCR 1  | gAggAgggCAGCAAACgggAAgAgTCTTCCTTTACgTTgcgcagcatatcgtcatccat    | B1        |
| Act Short HCR 3  | gAggAgggCAGCAAACgggAAgAgTCTTCCTTTACgTTcattcccacatcacaccctg     | B1        |
| Act Short HCR 5  | gAggAgggCAGCAAACgggAAgAgTCTTCCTTTACgTTtacctctctgtctgggctc      | B1        |
| Act Short HCR 7  | gAggAgggCAGCAAACgggAAgAgTCTTCCTTTACgTTccagttggtaacaatgccatg    | B1        |
| Act Short HCR 9  | gAggAgggCAGCAAACgggAAgAgTCTTCCTTTACgTTcagcagctcattgtagaaggt    | B1        |
| Act Short HCR 11 | gAggAgggCAGCAAACgggAAgAgTCTTCCTTTACgTTtgaaggtctcaaacatgatctg   | B1        |
| Act Short HCR 13 | gAggAgggCAGCAAACgggAAgAgTCTTCCTTTACgTTcatacagggacagcacagcctg   | B1        |
| Act Short HCR 15 | gAggAgggCAGCAAACgggAAgAgTCTTCCTTTACgTTtgacccctctccggagtccat    | B1        |
| Act Short HCR 17 | gAggAgggCAGCAAACgggAAgAgTCTTCCTTTACgTTggatggcgtgaggagagacata   | B1        |
| Act Short HCR 19 | gAggAgggCAGCAAACgggAAgAgTCTTCCTTTACgTTaagctgtagccacgctcggtca   | B1        |
| Act Short HCR 21 | gAggAgggCAGCAAACgggAAgAgTCTTCCTTTACgTTtagcttctcttgatgtcacgca   | B1        |
| Act Short HCR 23 | gAggAgggCAGCAAACgggAAgAgTCTTCCTTTACgTTgatcggcagtgccatctcct     | B1        |
| Act Short HCR 25 | gAggAgggCAGCAAACgggAAgAgTCTTCCTTTACgTTatgacctggcctcaggcagct    | B1        |
| Act Short HCR 27 | gAggAgggCAGCAAACgggAAgAgTCTTCCTTTACgTTggctggaaaagagcctcagggc   | B1        |
| Act Short HCR 29 | gAggAgggCAGCAAACgggAAgAgTCTTCCTTTACgTTtgaatgtagttcatggatgc     | B1        |
| Act Short HCR 31 | gAggAgggCAGCAAACgggAAgAgTCTTCCTTTACgTTttggcatagaggtctttacgga   | B1        |
| Act Short HCR 33 | gAggAgggCAGCAAACgggAAgAgTCTTCCTTTACgTTctgtcagcaatgcctgggtaca   | B1        |
| Act Short HCR 35 | gAggAgggCAGCAAACgggAAgAgTCTTCCTTTACgTTttgatcttcatggtgctaggag   | B1        |
| Act Short HCR 37 | gAggAgggCAGCAAACgggAAgAgTCTTCCTTTACgTTgagccaccgatccacacagagt   | B1        |
| Act Short HCR 39 | gAggAgggCAGCAAACgggAAgAgTCTTCCTTTACgTTtgcttctgatccacatctgct    | B1        |
| Act Short HCR 41 | gAggAgggCAGCAAACgggAAgAgTCTTCCTTTACgTTtagaagcacttgcggtgcacga   | B1        |
| Act Short HCR 41 | gAggAgggCAGCAAACgggAAgAgTCTTCCTTTACgTTtagaagcacttgcggtgcacga   | B1        |

|            | Probe Sequence                                                | Initiator |
|------------|---------------------------------------------------------------|-----------|
| DLG4 B1 2  | GGGCTGTGTTCCAGAGGGGGCGAAgCATTCTTCTTgAggAgggCAgCAAACgggAAgAg   | B1        |
| DLG4 B1 4  | GTGTCCGTGTTGACAATCACAGAAgCATTCTTCTTgAggAgggCAgCAAACgggAAgAg   | B1        |
| DLG4 B1 6  | TCCTCATCTCCATCTCCCCCTAAgCATTCTTCTTgAggAgggCAgCAAACgggAAgAg    | B1        |
| DLG4 B1 8  | GTGCCACCTGCGATGCTGAAGCAAgCATTCTTCTTgAggAgggCAgCAAACgggAAgAg   | B1        |
| DLG4 B1 10 | GGAAATGATCTTGGTGATAAAGAAAgCATTCTTCTTgAggAgggCAgCAAACgggAAgAg  | B1        |
| DLG4 B1 12 | AACAGGATGCTGTGTTGACCAAAgCATTCTTCTTgAggAgggCAgCAAACgggAAgAg    | B1        |
| DLG4 B1 14 | AGGGCTCCACTGCAGCTGAATAAgCATTCTTCTTgAggAgggCAgCAAACgggAAgAg    | B1        |
| DLG4 B1 16 | GCTGGGGTTCCGGCGCATAAAgCATTCTTCTTgAggAgggCAgCAAACgggAAgAg      | B1        |
| DLG4 B1 18 | CTGAAGCCAAGTCCTTTAGGCCAAgCATTCTTCTTgAggAgggCAgCAAACgggAAgAg   | B1        |
| DLG4 B1 20 | ACGTAGATGCTATTATCTCCAGAAgCATTCTTCTTgAggAgggCAgCAAACgggAAgAg   | B1        |
| DLG4 B1 22 | CCGATCTGCAACCTGCCATCTAAgCATTCTTCTTgAggAgggCAgCAAACgggAAgAg    | B1        |
| DLG4 B1 24 | TCCTCATGATGACATCCTCTAAAgCATTCTTCTTgAggAgggCAgCAAACgggAAgAg    | B1        |
| DLG4 B1 26 | TTGGCCACCTTTAGGTACACAAAAgCATTCTTCTTgAggAgggCAgCAAACgggAAgAg   | B1        |
| DLG4 B1 28 | GAGGTTGTGATGCTGGGGGAGAAgCATTCTTCTTgAggAgggCAgCAAACgggAAgAg    | B1        |
| DLG4 B1 30 | TCGGTGCCCAAGTAGCTGTATAAgCATTCTTCTTgAggAgggCAgCAAACgggAAgAg    | B1        |
| DLG4 B2 1  | TCCTCATCTTGGTAGCGGTATTAAGCTCAgTCCATCCTCgTAAATCCTCATCAATCATC   | B2        |
| DLG4 B2 3  | GGAGAATTTGGCCTGTTGGGGAAAAGCTCAgTCCATCCTCgTAAATCCTCATCAATCATC  | B2        |
| DLG4 B2 5  | GTTCCGTTACATATCCTGGGAAAAGCTCAgTCCATCCTCgTAAATCCTCATCAATCATC   | B2        |
| DLG4 B2 7  | AGACCTGAGTTACCCCTTTCCAAAAGCTCAgTCCATCCTCgTAAATCCTCATCAATCATC  | B2        |
| DLG4 B2 9  | GATGGGTCGTACCGATGTGTAAAgCTCAgTCCATCCTCgTAAATCCTCATCAATCATC    | B2        |
| DLG4 B2 11 | AGGGGCCATCCTGGGCTGCAGAAAAGCTCAgTCCATCCTCgTAAATCCTCATCAATCATC  | B2        |
| DLG4 B2 13 | GTCACCTCCCGACATCCACTTAAAgCTCAgTCCATCCTCgTAAATCCTCATCAATCATC   | B2        |
| DLG4 B2 15 | TAGAGGGGAACGATGGAACCCGAAAAGCTCAgTCCATCCTCgTAAATCCTCATCAATCATC | B2        |
| DLG4 B2 17 | TTGATAAGCTTGATCTCTATGAAAAGCTCAgTCCATCCTCgTAAATCCTCATCAATCATC  | B2        |
| DLG4 B2 19 | ATGTGCTGGTTCCCAACGCCAAAAGCTCAgTCCATCCTCgTAAATCCTCATCAATCATC   | B2        |
| DLG4 B2 21 | TGGGCAGCGCCTCCTTCGATGAAAAGCTCAgTCCATCCTCgTAAATCCTCATCAATCATC  | B2        |
| DLG4 B2 23 | CCCACACTGTTGACCGCCAGGAAAAGCTCAgTCCATCCTCgTAAATCCTCATCAATCATC  | B2        |
| DLG4 B2 25 | TCATATGTGTTCTCAGGGCTGAAAAGCTCAgTCCATCCTCgTAAATCCTCATCAATCATC  | B2        |
| DLG4 B2 27 | TAGCTGCTACTCAGGTAGGCATAAAgCTCAgTCCATCCTCgTAAATCCTCATCAATCATC  | B2        |
| DLG4 B2 29 | CTGATCTCATTGTCCAGGTCTAAAgCTCAgTCCATCCTCgTAAATCCTCATCAATCATC   | B2        |

|                | Probe Sequence                                               | Initiator |
|----------------|--------------------------------------------------------------|-----------|
| Camk2a iso2 1  | gAggAgggCAgCAAACgggAAgAgTCTTCCTTTACgAACGGGTGCAGGTGATGGTAGCCA | B1        |
| Camk2a iso2 2  | CCTCgTAAATCCTCATCAATCATCCAgtAAACCgCCAATCCTCAAAGAGCTGGTACTCTT | B2        |
| Camk2a iso2 3  | gAggAgggCAgCAAACgggAAgAgTCTTCCTTTACgAAACAGAGAAGGCTCCCTTTCCCA | B1        |
| Camk2a iso2 4  | CCTCgTAAATCCTCATCAATCATCCAgtAAACCgCCAACCAGCCAGCACCTTACACACC  | B2        |
| Camk2a iso2 5  | gAggAgggCAgCAAACgggAAgAgTCTTCCTTTACgAAATAATCTTGGCAGCATACTCCT | B1        |
| Camk2a iso2 6  | CCTCgTAAATCCTCATCAATCATCCAgtAAACCgCCAATGATCTCTGGCTGAAAGCTTCT | B2        |
| Camk2a iso2 7  | gAggAgggCAgCAAACgggAAgAgTCTTCCTTTACgAACGGCCTCACGCTCCAGCTTCT  | B1        |
| Camk2a iso2 8  | CCTCgTAAATCCTCATCAATCATCCAgtAAACCgCCAATATTGGGGTGTCTCAACAAGC  | B2        |
| Camk2a iso2 9  | gAggAgggCAgCAAACgggAAgAgTCTTCCTTTACgAAGAGATGCTGTCATGGAGTCGGA | B1        |
| Camk2a iso2 10 | CCTCgTAAATCCTCATCAATCATCCAgtAAACCgCCAATCGAAGATAAGGTAGTGGTGCC | B2        |
| Camk2a iso2 11 | gAggAgggCAgCAAACgggAAgAgTCTTCCTTTACgAAAACAGTCCCCACCAGTAACCA  | B1        |
| Camk2a iso2 12 | CCTCgTAAATCCTCATCAATCATCCAgtAAACCgCCAATGTAATACTCCGGGCCACAA   | B2        |
| Camk2a iso2 13 | gAggAgggCAgCAAACgggAAgAgTCTTCCTTTACgAAATACAGTGGCTGGCATCAGCTT | B1        |
| Camk2a iso2 14 | CCTCgTAAATCCTCATCAATCATCCAgtAAACCgCCAACAGTGTAGCACAGCTCCAAGA  | B2        |
| Camk2a iso2 15 | gAggAgggCAgCAAACgggAAgAgTCTTCCTTTACgAACGATGCACCACCCCATCTGGT  | B1        |
| Camk2a iso2 16 | CCTCgTAAATCCTCATCAATCATCCAgtAAACCgCCAAGCCAGCAACAGATTCTCAGGCT | B2        |
| Camk2a iso2 17 | gAggAgggCAgCAAACgggAAgAgTCTTCCTTTACgAAACAGCAGCGCCCTTGAGCTTCG | B1        |
| Camk2a iso2 18 | CCTCgTAAATCCTCATCAATCATCCAgtAAACCgCCAATCTATGGCCAGGCCAAAGTCTG | B2        |
| Camk2a iso2 19 | gAggAgggCAgCAAACgggAAgAgTCTTCCTTTACgAACATGCCTGCTGCTCCCCCTCCA | B1        |
| Camk2a iso2 20 | CCTCgTAAATCCTCATCAATCATCCAgtAAACCgCCAAGGATCCAGGTGTCCCTGCGA   | B2        |
| Camk2a iso2 21 | gAggAgggCAgCAAACgggAAgAgTCTTCCTTTACgAATCCTTCTCAGCACTTCTGGGG  | B1        |
| Camk2a iso2 22 | CCTCgTAAATCCTCATCAATCATCCAgtAAACCgCCAAGCCCACAGGTCCACGGGCTTCC | B2        |
| Camk2a iso2 23 | gAggAgggCAgCAAACgggAAgAgTCTTCCTTTACgAAAAGATATACAGGATGACGCCAC | B1        |
| Camk2a iso2 24 | CCTCgTAAATCCTCATCAATCATCCAgtAAACCgCCAATCATCCAGAACGGGGGATACC  | B2        |
| Camk2a iso2 25 | gAggAgggCAgCAAACgggAAgAgTCTTCCTTTACgAATGACGGCGATGCTGGT       | B1        |
| Camk2a iso2 26 | CCTCgTAAATCCTCATCAATCATCCAgtAAACCgCCAAGATGGGAAATCATAGGCACCAg | B2        |
| Camk2a iso2 27 | gAggAgggCAgCAAACgggAAgAgTCTTCCTTTACgAAGGGGTGACGGTGTCCATTCTG  | B1        |
| Camk2a iso2 28 | CCTCgTAAATCCTCATCAATCATCCAgtAAACCgCCAAGCATCTTATTGATCAGATCCT  | B2        |
| Camk2a iso2 29 | gAggAgggCAgCAAACgggAAgAgTCTTCCTTTACgAAATGCGTTTGGACGGTTGATGG  | B1        |
| Camk2a iso2 30 | CCTCgTAAATCCTCATCAATCATCCAgtAAACCgCCAATCGGGTGTGTTGAGAGCCTCAG | B2        |
| Camk2a iso2 31 | gAggAgggCAgCAAACgggAAgAgTCTTCCTTTACgAAGCCACGGTGGAGCGGTGCGAGA | B1        |
| Camk2a iso2 32 | CCTCgTAAATCCTCATCAATCATCCAgtAAACCgCCAATCCACGGTCTCCTGTCTGTGCA | B2        |
| Camk2a iso2 33 | gAggAgggCAgCAAACgggAAgAgTCTTCCTTTACgAACTGGCATTGAACTTCTCAGGC  | B1        |
| Camk2a iso2 34 | CCTCgTAAATCCTCATCAATCATCCAgtAAACCgCCAAGTGGTGAGGATGGCTCCCTTCA | B2        |
| Camk2a iso2 35 | gAggAgggCAgCAAACgggAAgAgTCTTCCTTTACgAAGAGAAGTCTGGTGGCCAGCA   | B1        |
| Camk2a iso2 36 | CCTCgTAAATCCTCATCAATCATCCAgtAAACCgCCAATTCTTCTGTGTTTCTCCGCTCT | B2        |
| Camk2a iso2 37 | gAggAgggCAgCAAACgggAAgAgTCTTCCTTTACgAATCAGAAGATTCTTACACCCAT  | B1        |
| Camk2a iso2 38 | CCTCgTAAATCCTCATCAATCATCCAgtAAACCgCCAATCTTCGCTCAATGGTGGTGT   | B2        |
| Camk2a iso2 39 | gAggAgggCAgCAAACgggAAgAgTCTTCCTTTACgAAATTTCTGTTTGGCAGCTTTGG  | B1        |
| Camk2a iso2 40 | CCTCgTAAATCCTCATCAATCATCCAgtAAACCgCCAAGCTTCGATCAGTGTCTGTGCA  | B2        |
| Camk2a iso2 41 | gAggAgggCAgCAAACgggAAgAgTCTTCCTTTACgAAGACTCAAAGTCTCCATTGCTTA | B1        |
| Camk2a iso2 42 | CCTCgTAAATCCTCATCAATCATCCAgtAAACCgCCAAGTCTTCCAGGGTCGCACATCT  | B2        |
| Camk2a iso2 43 | gAggAgggCAgCAAACgggAAgAgTCTTCCTTTACgAACCCAGGGCCTCTGTTCAAAGG  | B1        |
| Camk2a iso2 44 | CCTCgTAAATCCTCATCAATCATCCAgtAAACCgCCAACGATGAAAGTCCAGGCCCTCCA | B2        |
| Camk2a iso2 45 | gAggAgggCAgCAAACgggAAgAgTCTTCCTTTACgAAGACCACAGGTTTTCAAATAGA  | B1        |
| Camk2a iso2 46 | CCTCgTAAATCCTCATCAATCATCCAgtAAACCgCCAATGGTGGTGTGCACGGGCTTGC  | B2        |
| Camk2a iso2 47 | gAggAgggCAgCAAACgggAAgAgTCTTCCTTTACgAAATCAGTGGATGTGAGGGTTCA  | B1        |
| Camk2a iso2 48 | CCTCgTAAATCCTCATCAATCATCCAgtAAACCgCCAATATAGGCGATGCAGGCTGACT  | B2        |

Accession Number

| Accession Number | Probe Sequence                                                | Initiator |
|------------------|---------------------------------------------------------------|-----------|
| mCherry 2C 1     | cttcttcaccttttgaaccatAAgCATTCTTTCTTgAggAgggCAgCAAACgggAAgAg   | B1        |
| mCherry 2C 3     | ccatagtaactttaaactctcatAAgCATTCTTTCTTgAggAgggCAgCAAACgggAAgAg | B1        |
| mCherry 2C 5     | cttcaccttcaccttcaatttAAgCATTCTTTCTTgAggAgggCAgCAAACgggAAgAg   | B1        |
| mCherry 2C 7     | caccttttagtaactttcaatttAAgCATTCTTTCTTgAggAgggCAgCAAACgggAAgAg | B1        |
| mCherry 2C 9     | catacataaattgtggtgacaaAAgCATTCTTTCTTgAggAgggCAgCAAACgggAAgAg  | B1        |
| mCherry 2C 11    | ttaaataatctggaatcagcAAgCATTCTTTCTTgAggAgggCAgCAAACgggAAgAg    | B1        |
| mCherry 2C 13    | tcaaaattcataactctttcccAAgCATTCTTTCTTgAggAgggCAgCAAACgggAAgAg  | B1        |
| mCherry 2C 15    | ctctcaatttaactttataaatAAgCATTCTTTCTTgAggAgggCAgCAAACgggAAgAg  | B1        |
| mCherry 2C 17    | ccatagtttttttgcataaacAAgCATTCTTTCTTgAggAgggCAgCAAACgggAAgAg   | B1        |
| mCherry 2C 19    | tcaatctttttaaattcaccAAgCATTCTTTCTTgAggAgggCAgCAAACgggAAgAg    | B1        |
| mCherry 2C 21    | taatattaacattataagcaccAAgCATTCTTTCTTgAggAgggCAgCAAACgggAAgAg  | B1        |
| mCherry 2C 23    | tttcatattgttcaacaatagtAAgCATTCTTTCTTgAggAgggCAgCAAACgggAAgAg  | B1        |
| mCherry 2C 2     | attctttaataatagccatattAAgCTCAGTCCATCCTCgTAAATCCTCATCAATCATC   | B2        |
| mCherry 2C 4     | attcatgaccattaactgaaccAAgCTCAGTCCATCCTCgTAAATCCTCATCAATCATC   | B2        |
| mCherry 2C 6     | cagtttgagtaccttcatatggAAgCTCAGTCCATCCTCgTAAATCCTCATCAATCATC   | B2        |
| mCherry 2C 8     | tatcccaagcaaatggtaatggAAgCTCAGTCCATCCTCgTAAATCCTCATCAATCATC   | B2        |
| mCherry 2C 10    | gatgtttaacataagcttttgaAAgCTCAGTCCATCCTCgTAAATCCTCATCAATCATC   | B2        |
| mCherry 2C 12    | ttaaaacctctggaaatgacaAAgCTCAGTCCATCCTCgTAAATCCTCATCAATCATC    | B2        |
| mCherry 2C 14    | gagtaacagtaacaacaccaccAAgCTCAGTCCATCCTCgTAAATCCTCATCAATCATC   | B2        |
| mCherry 2C 16    | gaccatctgatggaaaattagtAAgCTCAGTCCATCCTCgTAAATCCTCATCAATCATC   | B2        |
| mCherry 2C 18    | ttcttctgatgaagcttccaAAgCTCAGTCCATCCTCgTAAATCCTCATCAATCATC     | B2        |
| mCherry 2C 20    | gtaattgaactggttttttagcAAgCTCAGTCCATCCTCgTAAATCCTCATCAATCATC   | B2        |
| mCherry 2C 22    | tcattatgtaagtaatatccaAAgCTCAGTCCATCCTCgTAAATCCTCATCAATCATC    | B2        |
| mCherry 2C 24    | atttatataattcatcataccAAgCTCAGTCCATCCTCgTAAATCCTCATCAATCATC    | B2        |

Accession

| Accession         | Probe Sequence                                                 | Initiator |
|-------------------|----------------------------------------------------------------|-----------|
| DLG4 ShHCR mis 1  | AATACCGCTACCAAGATGAAGAAAgCTCagTCCATCCTCgTAAATCCTCATCAATCATC    | B2        |
| DLG4 ShHCR mis 3  | TCCCAACAGGCAATTCTCCAAAgCTCagTCCATCCTCgTAAATCCTCATCAATCATC      | B2        |
| DLG4 ShHCR mis 5  | CCCCAGGATATGTGAACGGAACAAAgCTCagTCCATCCTCgTAAATCCTCATCAATCATC   | B2        |
| DLG4 ShHCR mis 7  | TGGAAAGGGGTAAGTCTAGGTCTAAAgCTCagTCCATCCTCgTAAATCCTCATCAATCATC  | B2        |
| DLG4 ShHCR mis 9  | CACACATCGGTGACGACCCATCAAAGCTCagTCCATCCTCgTAAATCCTCATCAATCATC   | B2        |
| DLG4 ShHCR mis 11 | CTGCAGCCAGGATGGCCGCCTAAAgCTCagTCCATCCTCgTAAATCCTCATCAATCATC    | B2        |
| DLG4 ShHCR mis 13 | AAGTGGATGTCCGGGAGGTGACAAAgCTCagTCCATCCTCgTAAATCCTCATCAATCATC   | B2        |
| DLG4 ShHCR mis 15 | CGGGTTCATCGTTCGCCTCTAAAAGCTCagTCCATCCTCgTAAATCCTCATCAATCATC    | B2        |
| DLG4 ShHCR mis 17 | TCATAGAGATCAAGCTTATCAAAAAGCTCagTCCATCCTCgTAAATCCTCATCAATCATC   | B2        |
| DLG4 ShHCR mis 19 | GGGGCGTTGGGAACAGCACATAAAGCTCagTCCATCCTCgTAAATCCTCATCAATCATC    | B2        |
| DLG4 ShHCR mis 21 | TCATCGAAGGAGGCGCTGCCAAAAGCTCagTCCATCCTCgTAAATCCTCATCAATCATC    | B2        |
| DLG4 ShHCR mis 23 | TCCTGGCGGTCAACAGTGTGGGAAAAGCTCagTCCATCCTCgTAAATCCTCATCAATCATC  | B2        |
| DLG4 ShHCR mis 25 | CAGCCCTGAAGAACACATATGAAAAGCTCagTCCATCCTCgTAAATCCTCATCAATCATC   | B2        |
| DLG4 ShHCR mis 27 | ATGCCTACCTGAGTGACAGCTAAAAGCTCagTCCATCCTCgTAAATCCTCATCAATCATC   | B2        |
| DLG4 ShHCR mis 29 | AGCACCTGGACAATGAGATCAGAAAAGCTCagTCCATCCTCgTAAATCCTCATCAATCATC  | B2        |
| DLG4 ShHCR mis 2  | CGCCCCCTCTGGAACACAGCCCAAgCATTCTTTCTTgAggAggggCAgCAAACgggAAgAg  | B1        |
| DLG4 ShHCR mis 4  | CTGTGATTGTCAACACGGACACAAGCATTCTTTCTTgAggAggggCAgCAAACgggAAgAg  | B1        |
| DLG4 ShHCR mis 6  | AGGGGGAGATGGAGTATGAGGAAAAGCATTCTTTCTTgAggAggggCAgCAAACgggAAgAg | B1        |
| DLG4 ShHCR mis 8  | GCTTCAGCATCGCAGGTGGCACAAgCATTCTTTCTTgAggAggggCAgCAAACgggAAgAg  | B1        |
| DLG4 ShHCR mis 10 | TCTTTATCACCAAGATCATTCCAAGCATTCTTTCTTgAggAggggCAgCAAACgggAAgAg  | B1        |
| DLG4 ShHCR mis 12 | GGGTCAACGACAGCATCCTGTTAAgCATTCTTTCTTgAggAggggCAgCAAACgggAAgAg  | B1        |
| DLG4 ShHCR mis 14 | ATTCAGCTGAGTGGAGGCCCTAAgCATTCTTTCTTgAggAggggCAgCAAACgggAAgAg   | B1        |
| DLG4 ShHCR mis 16 | TCATGCGCCGGAAAACCCAGCAAAGCATTCTTTCTTgAggAggggCAgCAAACgggAAgAg  | B1        |
| DLG4 ShHCR mis 18 | GGCCTAAAGGACTTGGCTTCAGAAgCATTCTTTCTTgAggAggggCAgCAAACgggAAgAg  | B1        |
| DLG4 ShHCR mis 20 | CTGGAGATAATAGCATCTACGTAAgCATTCTTTCTTgAggAggggCAgCAAACgggAAgAg  | B1        |
| DLG4 ShHCR mis 22 | AGGATGGCAGGTTGCAGATCGGAAgCATTCTTTCTTgAggAggggCAgCAAACgggAAgAg  | B1        |
| DLG4 ShHCR mis 24 | TAGAGGATGTCATGCATGAGGAAAAGCATTCTTTCTTgAggAggggCAgCAAACgggAAgAg | B1        |
| DLG4 ShHCR mis 26 | TTGTGTACTAAAGGTGGCCAAAAGCATTCTTTCTTgAggAggggCAgCAAACgggAAgAg   | B1        |
| DLG4 ShHCR mis 28 | CTCCCCAGACATCACAACTCAAAGCATTCTTTCTTgAggAggggCAgCAAACgggAAgAg   | B1        |
| DLG4 ShHCR mis 30 | ATAGCAGCTACTTGGCACCGAAAAGCATTCTTTCTTgAggAggggCAgCAAACgggAAgAg  | B1        |

| Probe Name | Oligonucleotide Sequence | Sequence Name |
|------------|--------------------------|---------------|
| UBC        | atggtcttaccagtcagagt     | hUBC_1        |
|            | gacattctcgatggtgtcac     | hUBC_2        |
|            | gggatgccttccttatcttg     | hUBC_3        |
|            | atcttcagctgtttccag       | hUBC_4        |
|            | cagtgagtgtcttcacgaag     | hUBC_5        |
|            | tcctggatctttgcttgac      | hUBC_6        |
|            | caggtagactctttctgga      | hUBC_7        |
|            | cttcacgaagatctgcatcc     | hUBC_8        |
|            | tcttggatctttgccttgac     | hUBC_9        |
|            | cagtgagtgtcttcacgaag     | hUBC_10       |
|            | tgacgttctcgatagtgtca     | hUBC_11       |
|            | tcctgtcttggatctttgc      | hUBC_12       |
|            | caggtagactctttctgga      | hUBC_13       |
|            | cttcacgaagatctgcatcc     | hUBC_14       |
|            | agagtgatggtcttaccagt     | hUBC_15       |
|            | tcttggatctttgccttgac     | hUBC_16       |
|            | cttcacgaagatctgcatcc     | hUBC_17       |
|            | agagtgatggtcttaccagt     | hUBC_18       |
|            | tcttggatctttgccttgac     | hUBC_19       |
|            | tgttcccagcaaagatcaa      | hUBC_20       |
|            | cttcacgaagatctgcatcc     | hUBC_21       |
|            | agagtgatggtcttaccagt     | hUBC_22       |
|            | tcttggatctttgccttgac     | hUBC_23       |
|            | tgttcccagcaaagatcaa      | hUBC_24       |
|            | cttcacgaagatctgcatcc     | hUBC_25       |
|            | agagtgatggtcttaccagt     | hUBC_26       |
|            | tcttggatctttgccttgac     | hUBC_27       |
|            | tgttcccagcaaagatcaa      | hUBC_28       |
|            | gacattctcgatggtgtcac     | hUBC_29       |
|            | gggatgccttccttatcttg     | hUBC_30       |
|            | tgttcccagcaaagatcaa      | hUBC_31       |
|            | agagtggactctttctggat     | hUBC_32       |
| EEF2       | atctggtctaccgtgaagtt     | hEEF2_1       |
|            | ttggccttctgtccatgat      | hEEF2_2       |
|            | gtatcagtgaagcgtgtctc     | hEEF2_3       |
|            | ttgacttgatggtgatgcaa     | hEEF2_4       |
|            | ctcgtagaagaggagatgg      | hEEF2_5       |
|            | tccttgctctgcttgatgaa     | hEEF2_6       |
|            | gggagtcaatgaggttgatg     | hEEF2_7       |
|            | cgggccatctgttcatcat      | hEEF2_8       |
|            | gtggagatgatgacgttcac     | hEEF2_9       |
|            | gtaccgaggacaggatcgat     | hEEF2_10      |
|            | caaactgcttcagggtgaag     | hEEF2_11      |
|            | aacttgccacatacatctc      | hEEF2_12      |
|            | atgtcctctactttcttggc     | hEEF2_13      |
|            | ttcatgatcgatcaaacac      | hEEF2_14      |



|       |                      |                 |
|-------|----------------------|-----------------|
|       | gtccagtttgatgtccagtt | hEEF2_15        |
|       | gatggtgatcatctgcaaca | hEEF2_16        |
|       | tttggggtcacagcttttaa | hEEF2_17        |
|       | gtagaacccacctttgtcgg | hEEF2_18        |
|       | ccatgatcctgacctcagg  | hEEF2_19        |
|       | ttctcccaggggtatagtt  | hEEF2_20        |
|       | tctggattggcttcaggtag | hEEF2_21        |
|       | ggcccatcatcaagattggt | hEEF2_22        |
|       | gtcttcaccaggaactggtc | hEEF2_23        |
|       | ctgacgctgaacttcatcac | hEEF2_24        |
|       | atgatatgctctcccgactc | hEEF2_25        |
|       | gactctcactgacctctc   | hEEF2_26        |
|       | cttcatgtacagccggtgt  | hEEF2_27        |
|       | tcgcctttatcgatgtcctc | hEEF2_28        |
|       | tgatgtcggtaggatgttg  | hEEF2_29        |
|       | cactgtccttgatctcgttg | hEEF2_30        |
|       | gtcagcacactggcatagag | hEEF2_31        |
|       | atctccacaaggtagatggg | hEEF2_32        |
| USF2  | ggatccagacccgggtccag | usf2_withUTR_1  |
|       | tactggatgttggtcgcc   | usf2_withUTR_2  |
|       | catttgtctctgtcggaac  | usf2_withUTR_3  |
|       | atthtggatcacagcctgtc | usf2_withUTR_4  |
|       | gactgccaccattgctgaag | usf2_withUTR_5  |
|       | ctgggaaataggcaaactgt | usf2_withUTR_6  |
|       | gacacagccgtagtatctcc | usf2_withUTR_7  |
|       | gtctgaagcacatcctgggg | usf2_withUTR_8  |
|       | ggcgatcgtcctctgtgttc | usf2_withUTR_9  |
|       | tggttccatcaatthtggga | usf2_withUTR_10 |
|       | ttctcctctcatctcggggt | usf2_withUTR_11 |
|       | ctccacttcgttgctggg   | usf2_withUTR_12 |
|       | cagttgtgatcttgtcct   | usf2_withUTR_13 |
|       | gattttcgaaagctggacga | usf2_withUTR_14 |
|       | gttgtctgcgttacagtctg | usf2_withUTR_15 |
|       | ggccttggacaggatccctc | usf2_withUTR_16 |
|       | cgcaactcccggatgtaatc | usf2_withUTR_17 |
|       | ctgcatgcgctggttggtct | usf2_withUTR_18 |
|       | gctcggcctcttgaaggctc | usf2_withUTR_19 |
|       | agctcgttgcctatctgcag | usf2_withUTR_20 |
|       | caccatctccaggttgct   | usf2_withUTR_21 |
|       | tgtatccacagaaatgcatt | usf2_withUTR_22 |
|       | ggaggataccgtttccaagt | usf2_withUTR_23 |
|       | gtgagaccactagaagtgcc | usf2_withUTR_24 |
|       | cataggtccaggccccgggt | usf2_withUTR_25 |
|       | cagggaccagaaacaagag  | usf2_withUTR_26 |
|       | gggccagtttattgcagtta | usf2_withUTR_27 |
| TOP2A | ctgggcggagcaaaatatgt | hTOP2A_CDS_1    |
|       | tcttcatcgtaaaccacat  | hTOP2A_CDS_2    |

|                      |               |
|----------------------|---------------|
| ccggatcaattgtgactcta | hTOP2A_CDS_3  |
| ccttttccattattccatat | hTOP2A_CDS_4  |
| agaagtaggagctgtccaa  | hTOP2A_CDS_5  |
| ccagcaatatcatatgctct | hTOP2A_CDS_6  |
| ttactggcagtttattcca  | hTOP2A_CDS_7  |
| tgttgatccaaagctcttg  | hTOP2A_CDS_8  |
| aactggactgggccttaa   | hTOP2A_CDS_9  |
| atcattggcatcatcgagtt | hTOP2A_CDS_10 |
| gtcaggataagcgtacactc | hTOP2A_CDS_11 |
| ggaaaaccccatatttgtct | hTOP2A_CDS_12 |
| tttctgtactgaagacca   | hTOP2A_CDS_13 |
| ttggtcctgatctgcataa  | hTOP2A_CDS_14 |
| ctccagaaaacgatgtcgca | hTOP2A_CDS_15 |
| gttaaccattccttcgatc  | hTOP2A_CDS_16 |
| agctaattgggcaacctta  | hTOP2A_CDS_17 |
| atgtatcgtggactagcaga | hTOP2A_CDS_18 |
| acgctggtgtcatcatata  | hTOP2A_CDS_19 |
| ttcttctcatccatcaaac  | hTOP2A_CDS_20 |
| cccttgaagttctgtaact  | hTOP2A_CDS_21 |
| tatgagaggaggtgtcttct | hTOP2A_CDS_22 |
| tgtatggtattccctatagt | hTOP2A_CDS_23 |
| tcagtttagcagattcagca | hTOP2A_CDS_24 |
| cttcacaggatccgaatcat | hTOP2A_CDS_25 |
| gtggaatgactctttgacca | hTOP2A_CDS_26 |
| tgctcctatctgattctgaa | hTOP2A_CDS_27 |
| agtggaggtggaagactgac | hTOP2A_CDS_28 |
| aattcaaagctggatccctt | hTOP2A_CDS_29 |
| caggatcaggctttgagag  | hTOP2A_CDS_30 |
| cttgatttcttgcttgta   | hTOP2A_CDS_31 |
| tatggaagtcactctcc    | hTOP2A_CDS_32 |
| gacctagtctccttgccaag | NEAT1_1       |
| ggatattttccatgcagcct | NEAT1_2       |
| acaagttgaagattagccct | NEAT1_3       |
| ccttggcttggaaaaaagg  | NEAT1_4       |
| cgagctaagttcagttccac | NEAT1_5       |
| ggccgagcgaataacata   | NEAT1_6       |
| cctgtcaaacatgctaggtg | NEAT1_7       |
| actgccacctggaaaataaa | NEAT1_8       |
| gtgagctcacaagaagagtt | NEAT1_9       |
| accagatgaccaggaatgt  | NEAT1_10      |
| cggccatgaagcattttg   | NEAT1_11      |
| tcgcatgaggaacactata  | NEAT1_12      |
| aatctgcaggcatcaattga | NEAT1_13      |
| cctggaaacagaacattgga | NEAT1_14      |
| gcatctgctgtggactttt  | NEAT1_15      |
| ggctctggaacaagcattta | NEAT1_16      |
| tgagcatctgaaaaccttt  | NEAT1_17      |

NEAT1

|                       |          |
|-----------------------|----------|
| accggaggctcaatttagaa  | NEAT1_18 |
| caaggttccaagcacaaaac  | NEAT1_19 |
| acagcttaggatcttcttg   | NEAT1_20 |
| tggcatcaacgttaaaatgt  | NEAT1_21 |
| tctacaaggcatcaatctgc  | NEAT1_22 |
| aagaacttctccgagaaacg  | NEAT1_23 |
| gccccagttatttcatcag   | NEAT1_24 |
| gcgttagcacaacacaatg   | NEAT1_25 |
| ggaatgaccaactgtaccc   | NEAT1_26 |
| caatgccccaaactagacctg | NEAT1_27 |
| tcctagtaatctgcaatgca  | NEAT1_28 |
| agcaagaacaaaagagcact  | NEAT1_29 |
| ggtccttactagaatgcc    | NEAT1_30 |
| ctgtgtcacctgttttcagt  | NEAT1_31 |
| cctttggttctcgaaaaact  | NEAT1_32 |
| agctggtaaagacatttccc  | NEAT1_33 |
| ctctgaaacaggctgtcttg  | NEAT1_34 |
| gccccatcttcaagtgacta  | NEAT1_35 |
| aaccacctaagtgctaagg   | NEAT1_36 |
| tcgtcttaagtggtccctta  | NEAT1_37 |
| atccagaagagcccatctaa  | NEAT1_38 |
| acctgtgacaaatgaggaac  | NEAT1_39 |
| agatgtgtttctaaggcacg  | NEAT1_40 |
| acagtgaccacaaaaggtta  | NEAT1_41 |
| agcaaaggtacatggattct  | NEAT1_42 |
| cagggttttcagatcacaca  | NEAT1_43 |
| ccccaagtcattggttaaga  | NEAT1_44 |
| tccaacgacagtaattggt   | NEAT1_45 |
| ccatacatgctgactaat    | NEAT1_46 |
| caacagcatacccagacta   | NEAT1_47 |
| acagagcaacataccagtac  | NEAT1_48 |
